# Supplementary material for: Covering effect of conductive glass: a facile route to tailor the grain growth of hybrid perovskites for highly efficient solar cells
Source: Royal Society of Chemistry journal article supplement (doi:10.1039/c8ta07043a), 2018-01-01
Supplement: c8ta07043a1.pdf [file c8ta07043a1.pdf]

## Supporting Information

### Covering effect of conductive glass: a facile route to tailor the grain growth of the hybrid perovskite for highly efficient solar cells

*Deli Shen,<sup>a,b</sup> Haijuan Mao,<sup>a,b</sup> Yafeng Li,<sup>a,b</sup> \* Antonio Abate,<sup>b,c</sup> and Mingdeng Wei,<sup>a,b\*</sup>*

<sup>a</sup> State Key Laboratory of Photocatalysis on Energy and Environment, Fuzhou University, Fuzhou, Fujian 350002, China

<sup>b</sup> Institute of Advanced Energy Materials, Fuzhou University, Fuzhou, Fujian 350002, China

<sup>c</sup> Helmholtz-Zentrum Berlin für Materialien und Energie GmbH, Berlin, Hahn-Meitner-Platz 1, 14109, Germany

\*E-mail: liyf@fzu.edu.cn; wei-mingdeng@fzu.edu.cn

Tel./Fax: 86 591 22865057;

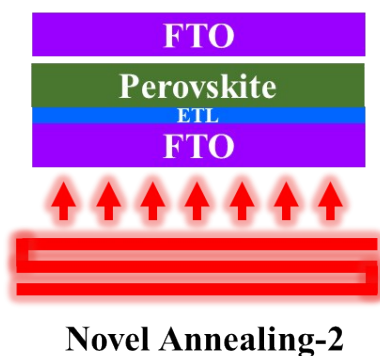

**Scheme S1.** Schematic of experimental process of another conductive glass-assisted annealing route.

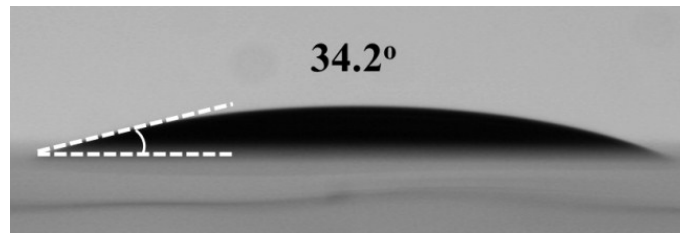

**Fig. S1** The contact angle of perovskite precursor solution on the assisted-conductive glass.

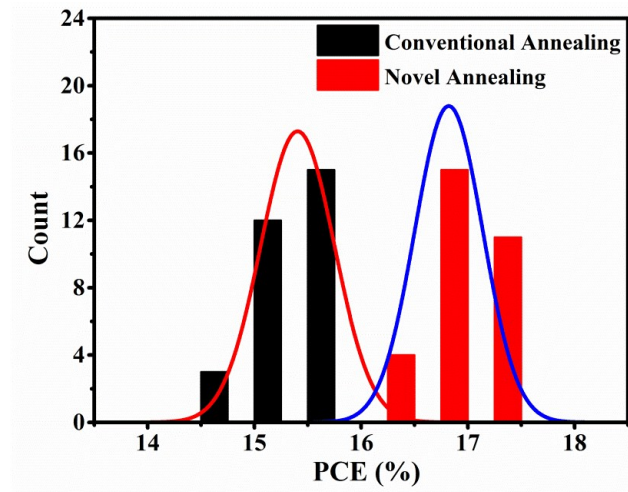

**Fig. S2** Statistical PCE (30 devices) of the PSCs based on CA (black) and NA (red) routes, respectively.

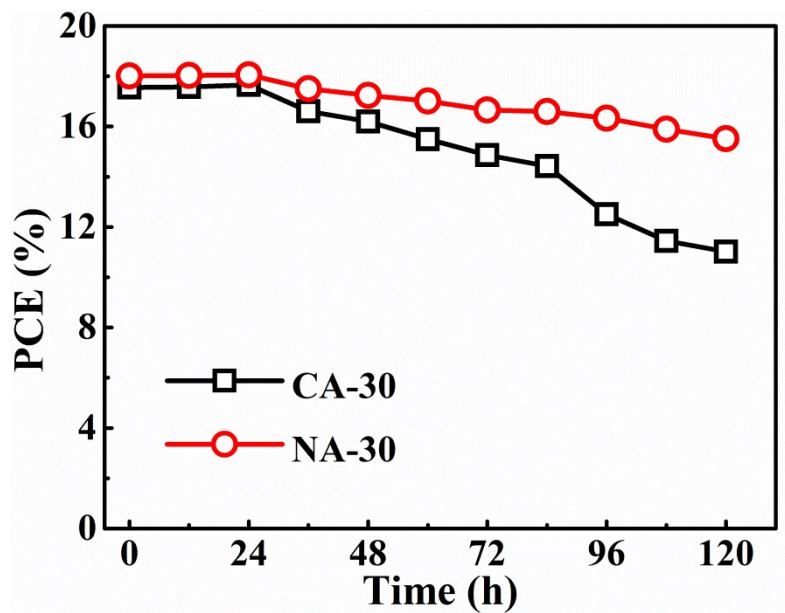

**Fig. S3** Stability test of the unsealed CA-30 and NA-30 based PSCs and the devices were stored in the dark condition with the ambient air at ~10% humidity.

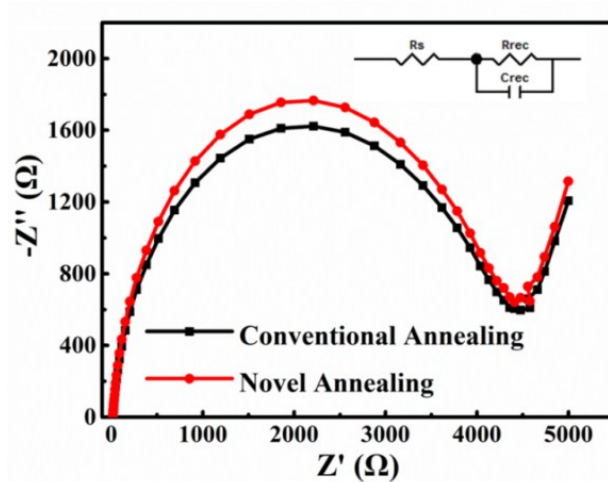

**Fig. S4** Nyquist plots of perovskite solar cells which were based on CA (black) and NA (red) routes, respectively, and the devices were measured at -0.7 V under dark conditions.

**Table S1.** EIS parameters of PSCs which were based on CA (black) and NA (red) routes, respectively.

| Annealing Route | $R_s/\Omega$ | $R_{rec}/\Omega$ |
|-----------------|--------------|------------------|
| Conventional    | 14.59        | 2694             |
| Novel           | 11.20        | 3509             |

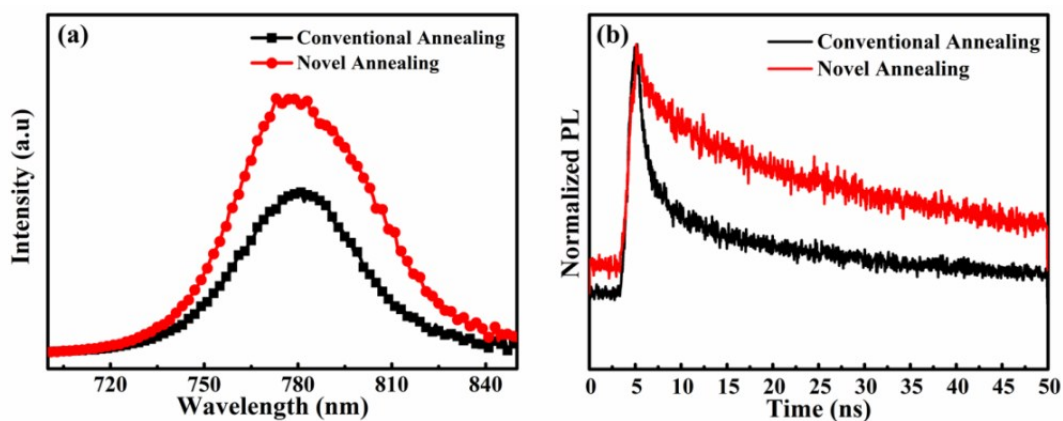

**Fig. S5** (a) Photoluminescence (PL) spectra (excitation at 406 nm) and (b) time-resolved photoluminescence (TR-PL) (excitation at 406 nm and emission at 780 nm) of the bare perovskite films prepared based on CA (black) and NA (red) routes, respectively.

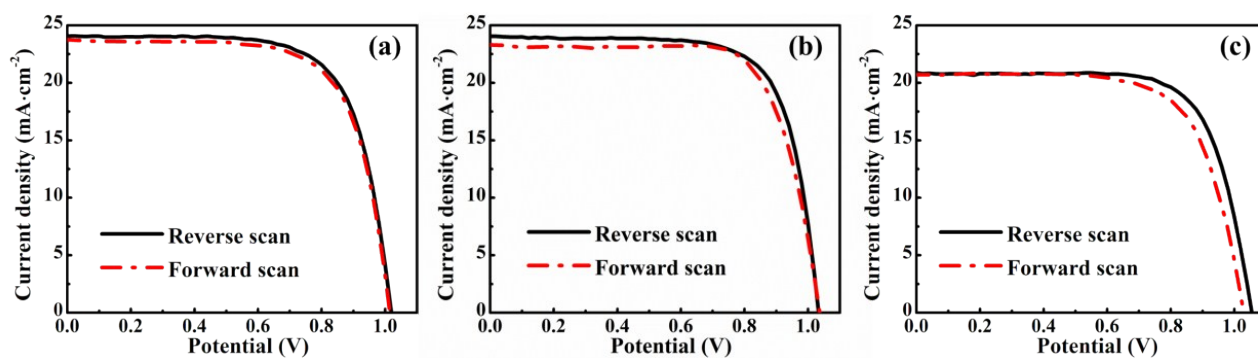

**Fig. S6** Current-voltage hysteresis curves of (a) NA-15, (b) NA-30 and (c) NA-60 based PSCs, respectively, starting from the reverse scan and continuing to the forward scan.

**Table S2** Comparison of the (a) NA-15, (b) NA-30 and (c) NA-60 based devices' performance parameters obtained from the reverse scan and forward scan, respectively.

| Novel Annealing time/ min | Scan direction | $J_{sc}/\text{mA}\cdot\text{cm}^{-2}$ | $V_{oc}/\text{V}$ | FF   | PCE/% |
|---------------------------|----------------|---------------------------------------|-------------------|------|-------|
| 15                        | reverse        | 24.06                                 | 1.02              | 0.70 | 17.26 |
|                           | forward        | 23.67                                 | 1.02              | 0.70 | 16.90 |
| 30                        | reverse        | 24.05                                 | 1.03              | 0.73 | 18.08 |
|                           | forward        | 23.32                                 | 1.03              | 0.72 | 17.29 |
| 60                        | reverse        | 20.89                                 | 1.05              | 0.72 | 15.82 |
|                           | forward        | 20.71                                 | 1.02              | 0.70 | 14.78 |



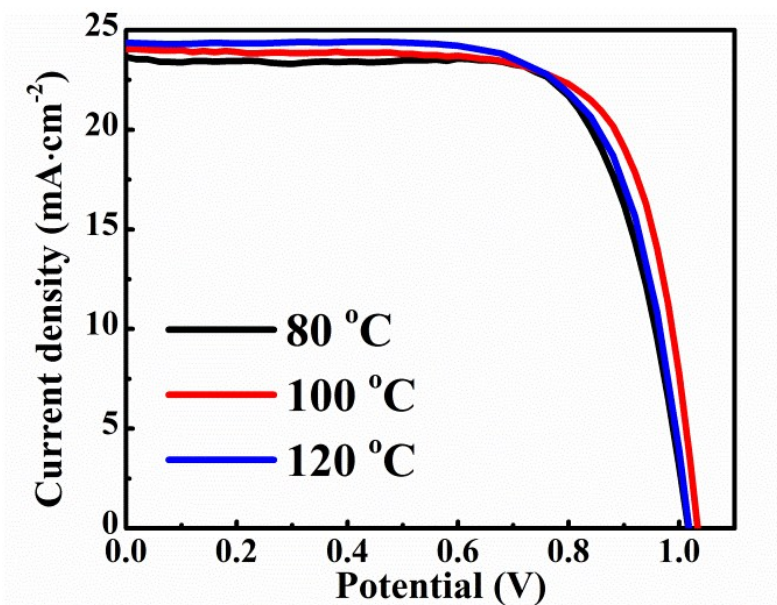

**Fig. S7** Current-voltage curves of NA-30 based PSCs that the developed perovskite films were annealed at 80, 100 and 120 °C, respectively.

**Table S3** Summary of the photovoltaic parameters of NA-30 based PSCs that the developed perovskite films were annealed at 80, 100 and 120 °C, respectively.

| Novel Annealing Temperature/ °C | $J_{sc}/\text{mA}\cdot\text{cm}^{-2}$ | $V_{oc}/\text{V}$ | FF   | PCE/% |
|---------------------------------|---------------------------------------|-------------------|------|-------|
| 80                              | 23.65                                 | 1.02              | 0.72 | 17.35 |
| 100                             | 24.04                                 | 1.03              | 0.73 | 18.06 |
| 120                             | 24.11                                 | 1.02              | 0.71 | 17.46 |

**Table S4.** EIS parameters of PSCs which were fabricated based on different novel annealing times.

| Novel annealing<br>time/ min | $R_s/\Omega$ | $R_{ct}/\Omega$ |
|------------------------------|--------------|-----------------|
| 15                           | 8.59         | 198             |
| 30                           | 7.90         | 171             |
| 60                           | 10.04        | 239             |
